# Supplementary material for: Selective inhibition of MBNL1–CCUG interaction by small molecules toward potential therapeutic agents for myotonic dystrophy type 2 (DM2)
Source: PubMed Central journal article supplement — Nucleic Acids Res. 2011 Jul 18;39(20):8881–90. doi: 10.1093/nar/gkr415 (PMC3203617; doi:10.1093/nar/gkr415), 2011-07-18

Supplementary Material

**Selective Inhibition of MBNL1·CCUG Interaction by Small Molecules Toward Potential Therapeutic Agents for Myotonic Dystrophy Type 2 (DM2)**

Chun-Ho Wong, Yuan Fu, Sreenivasa Rao Ramisetty, Anne M. Baranger,\*  
Steven C. Zimmerman\*

Department of Chemistry, University of Illinois at Urbana-Champaign, 600 S  
Mathews Avenue, Urbana, Illinois 61801

baranger@illinois.edu, sczimmer@illinois.edu

|                                                         |     |
|---------------------------------------------------------|-----|
| <b>Additional biophysical studies on ligand 1</b> ..... | S2  |
| <b>Melting curves for RNA used</b> .....                | S3  |
| <b>EMSA screenings</b> .....                            | S4  |
| <b>RNA cleavage test</b> .....                          | S5  |
| <b>ITC curves for ligand 3</b> .....                    | S6  |
| <b>NMR Spectra of ligands 2 and 3</b> .....             | S10 |

### Additional biophysical studies for ligand 1:

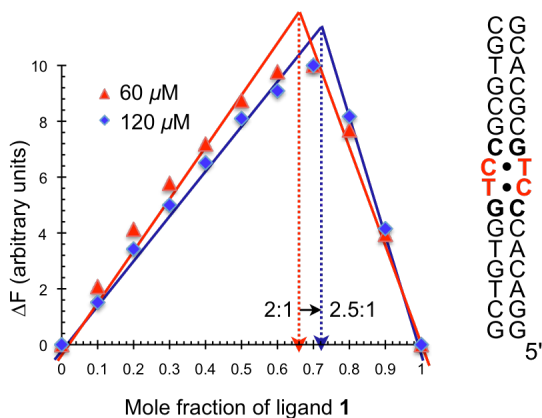

**Figure S1.** Job analysis of the stoichiometry of the DNA complex with ligand 1 with total concentrations of 60  $\mu\text{M}$  ( $\blacktriangle$ ) and 120  $\mu\text{M}$  ( $\blacklozenge$ ).

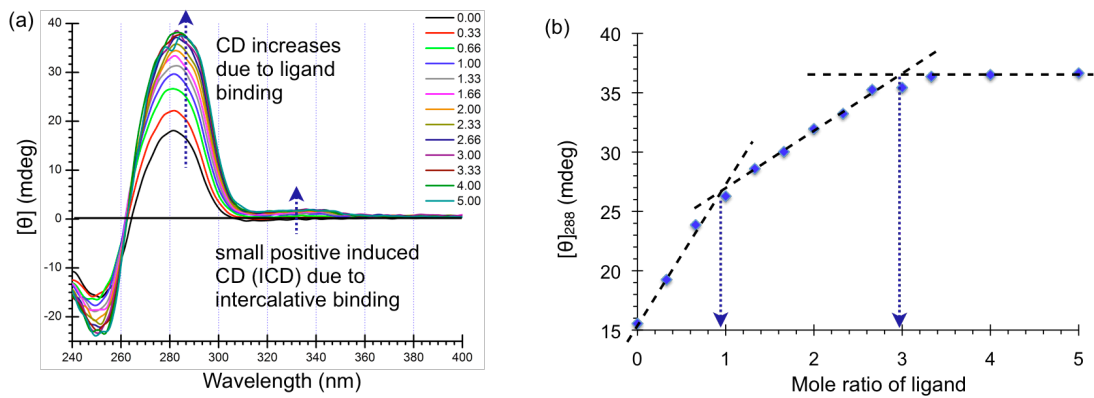

**Figure S2.** (a) CD spectra showing the change in CD signal upon ligand 1 binding. (b) A plot of CD signal at 288 nm versus the mole ratio of ligand to duplex indicating the saturation of binding sites at about 3 equivalents of ligand 1.

**Melting curves for RNA used:**

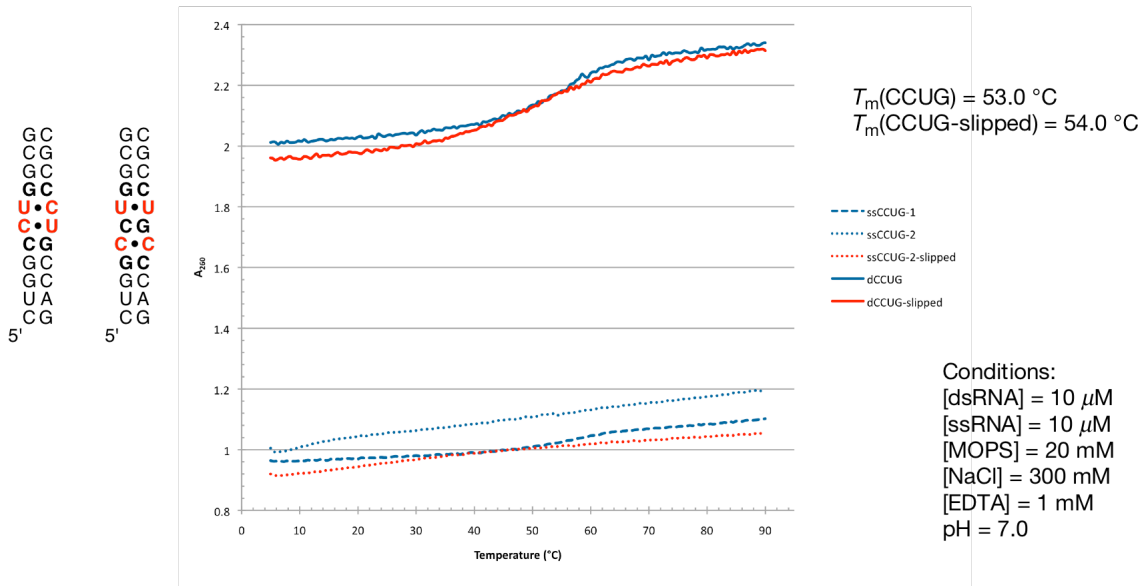

**Figure S4.** Melting curves for RNA duplex containing two mismatches and their corresponding single strands.

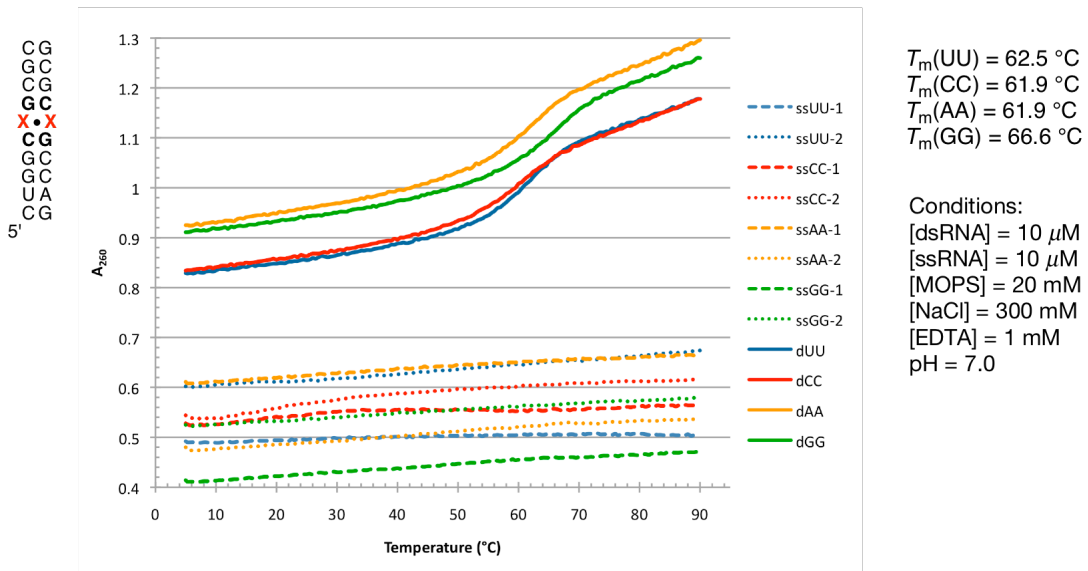

**Figure S5.** Melting curves for RNA containing a single mismatch and their corresponding single strands.

**EMSA:**

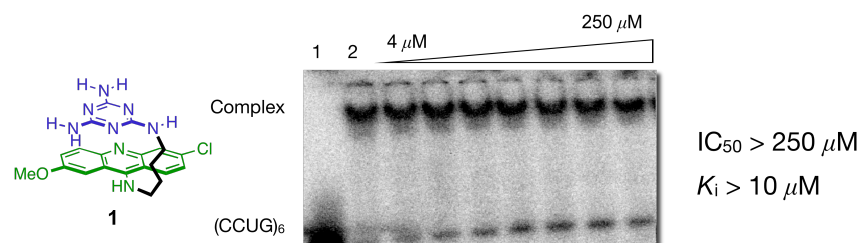

**Figure S6.** EMSA of ligand **1** in the presence of 100 nM tRNA. Control lane 1 (C1): RNA only. Control lane 2 (C2): RNA + MBNL1.

### RNA stability experiment:

Method: Labeled (CCUG)<sub>6</sub> RNA was annealed by incubation at 95 °C for 1 min and then placed on ice for 20 min in a buffer containing 66 mM NaCl, 6.7 mM MgCl<sub>2</sub> and 27 mM Tris-Cl (pH = 7.5). Ligands dissolved in DMSO were then added to the RNA at a volume ratio of 1:9. The final reaction volume was 20 μl with 1 nM RNA and 200 μM ligands. The reactions were incubated at room temperature for 1–4 h before loading on a 15% polyacrylamide-urea denaturing gel. Electrophoresis was performed at 200 V and the gel was visualized by PhosphorImaging.

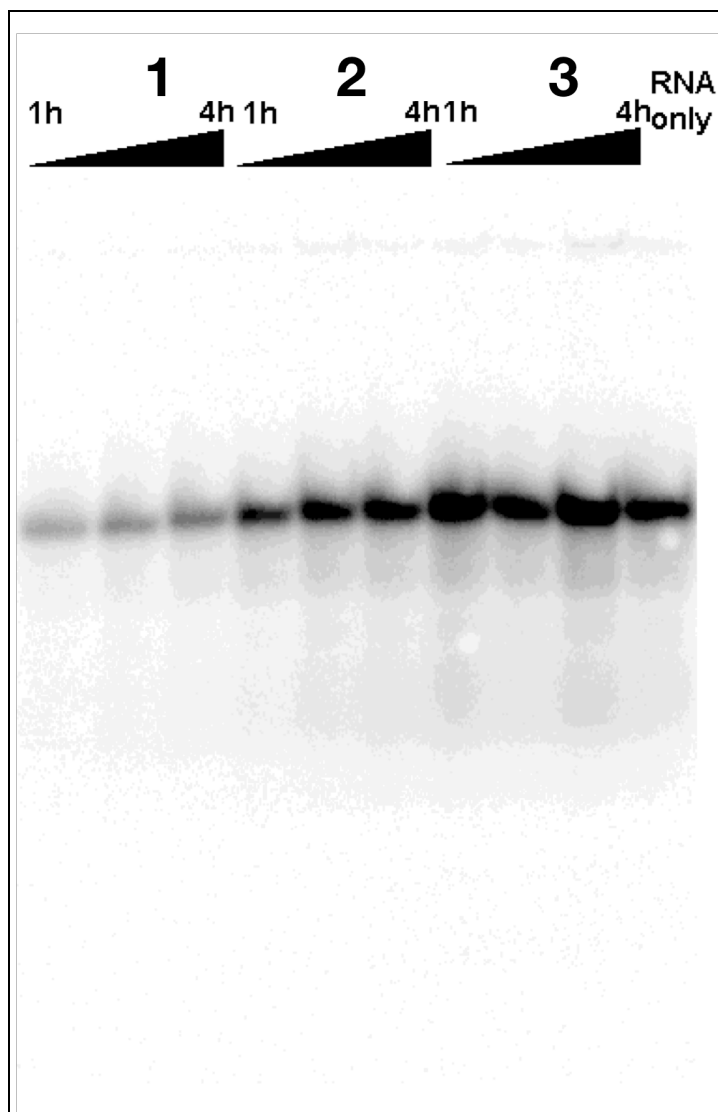

**Figure S7.** These studies showed that ligands 1–3 do not cleave the target RNA.



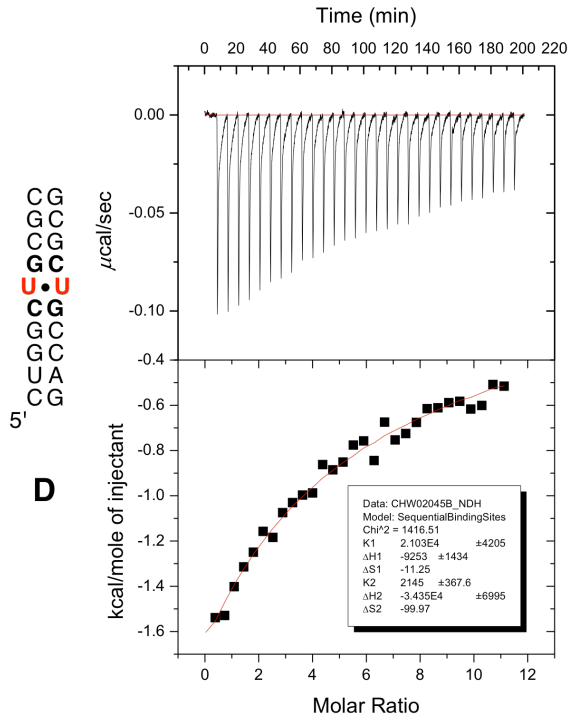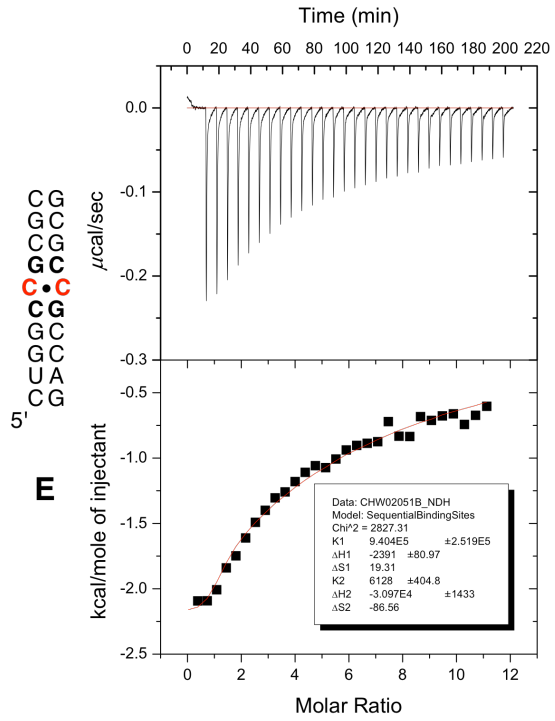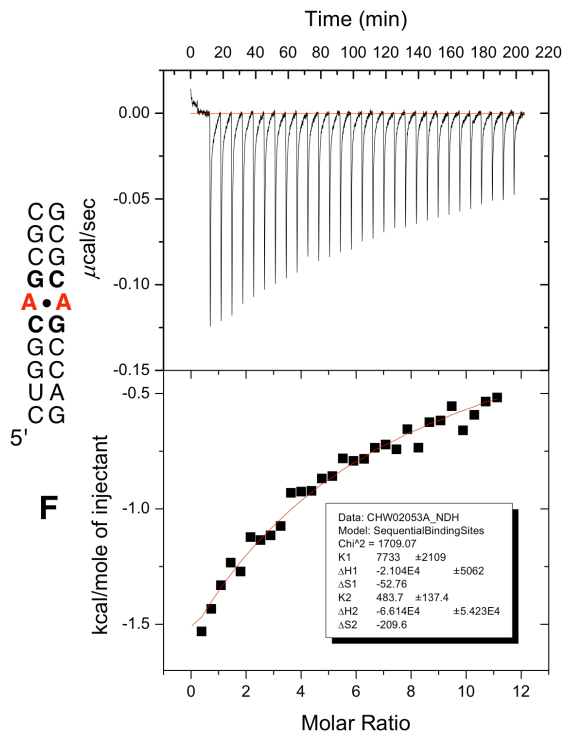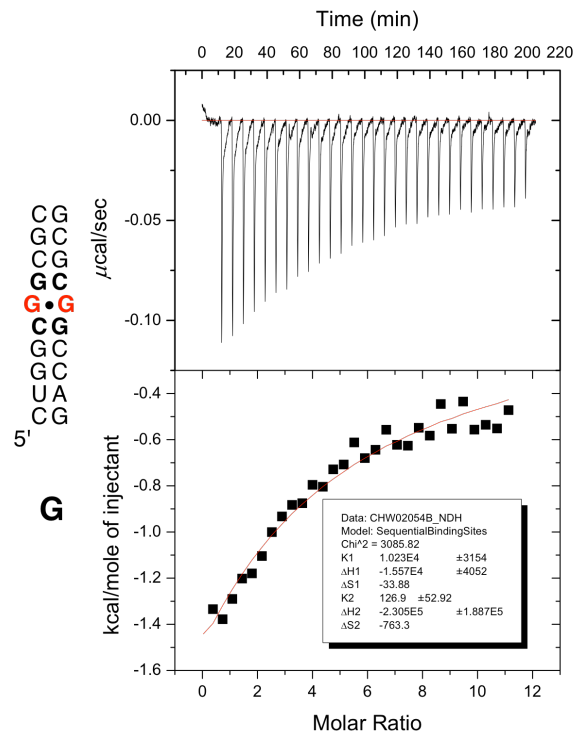

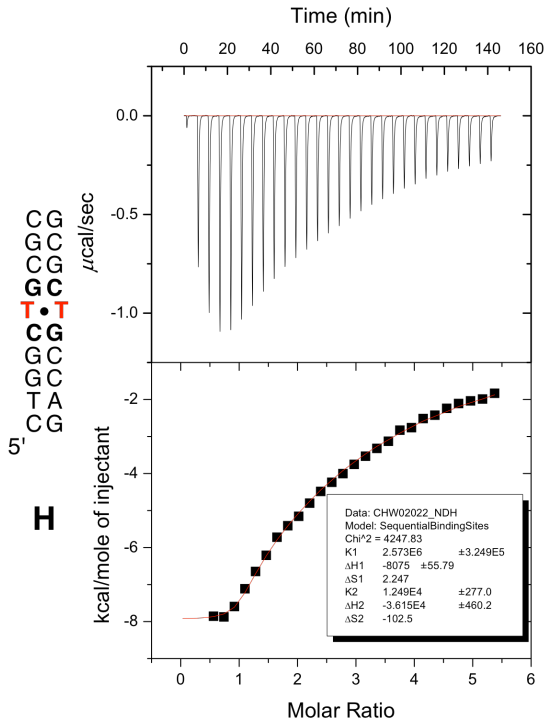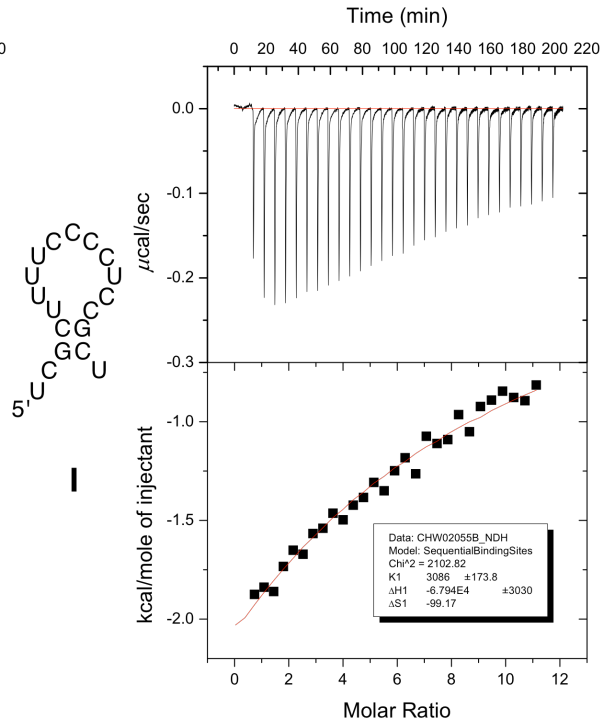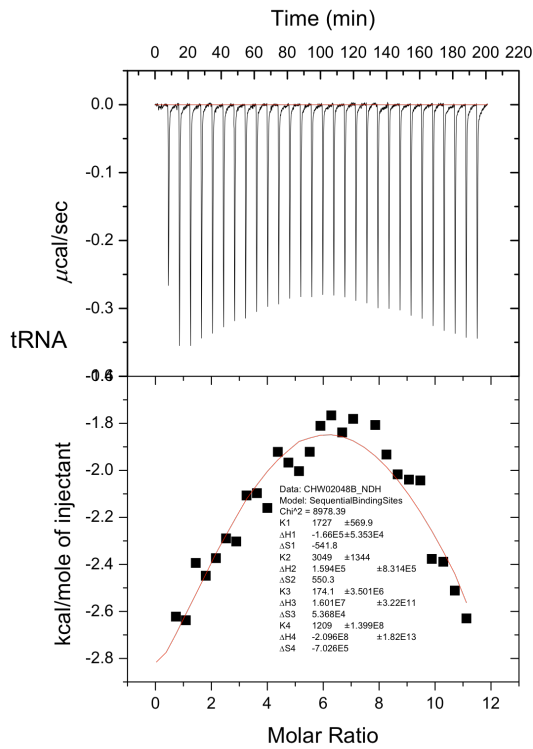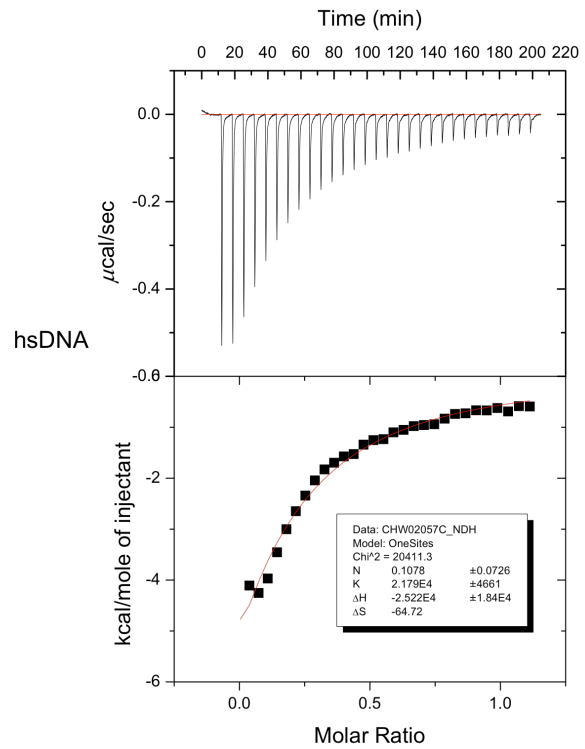



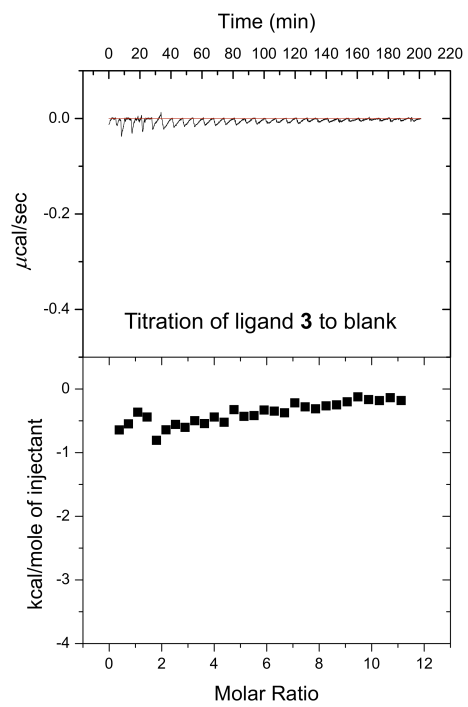

### <sup>1</sup>H NMR of Ligand 2:

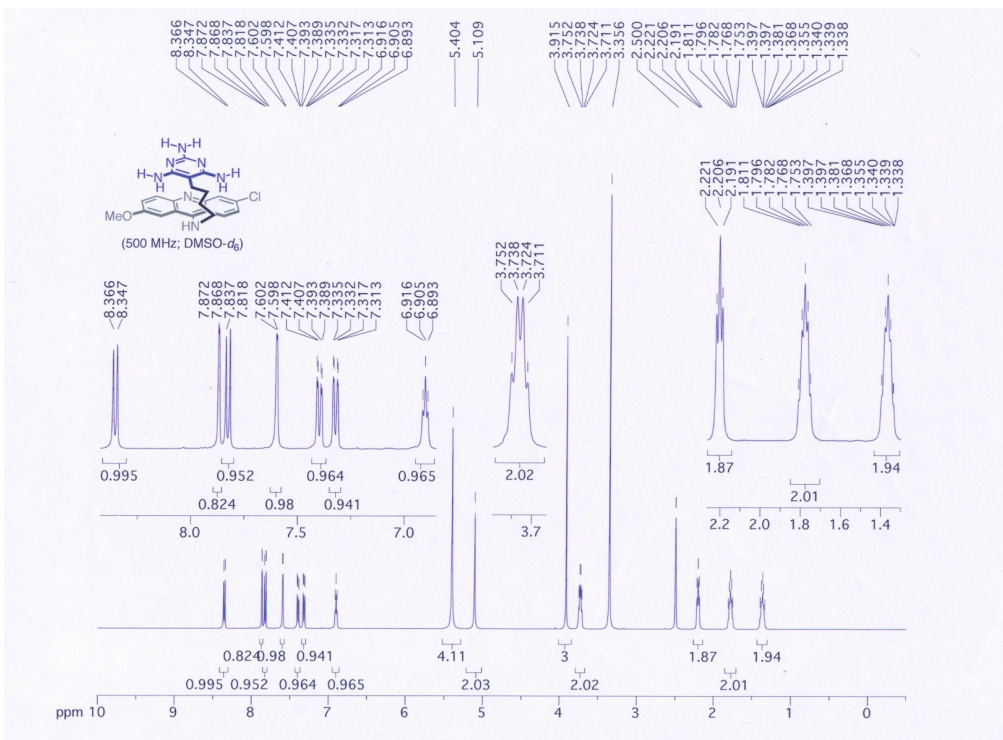

### <sup>13</sup>C NMR of Ligand 2:

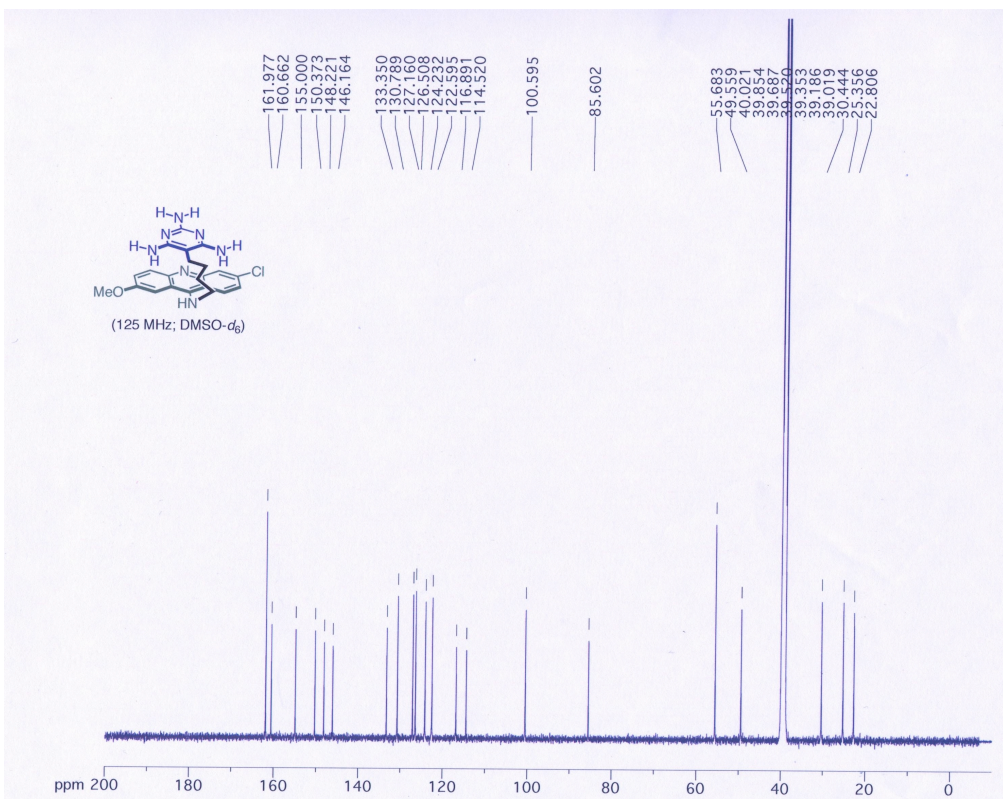

### <sup>1</sup>H NMR of Ligand 3:

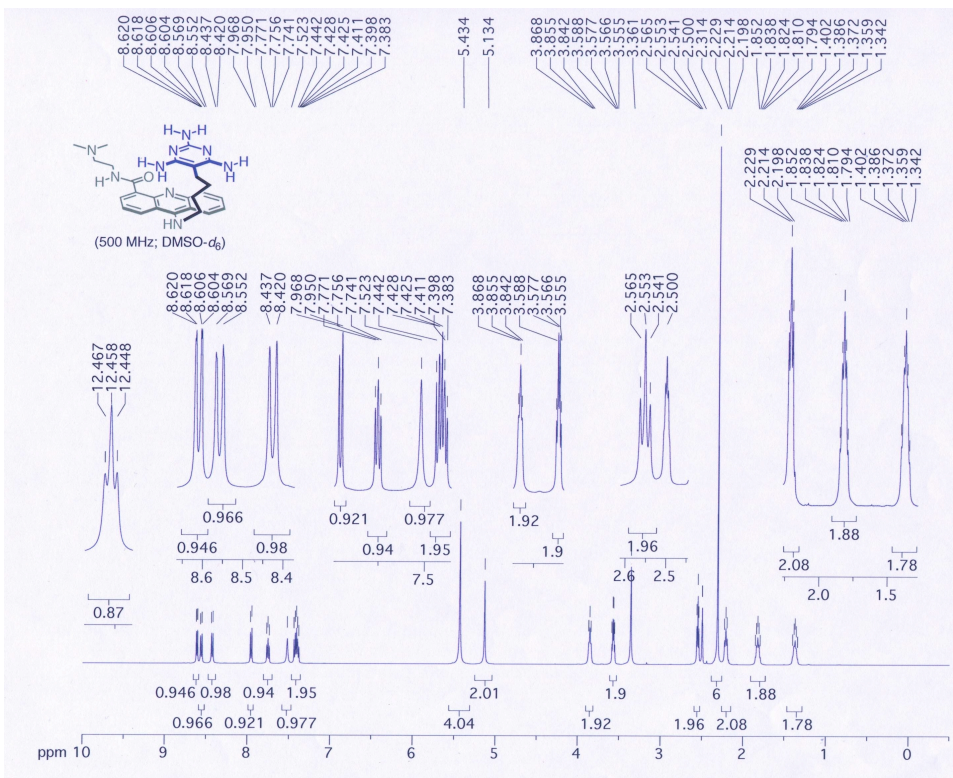

### <sup>13</sup>C NMR of Ligand 3:

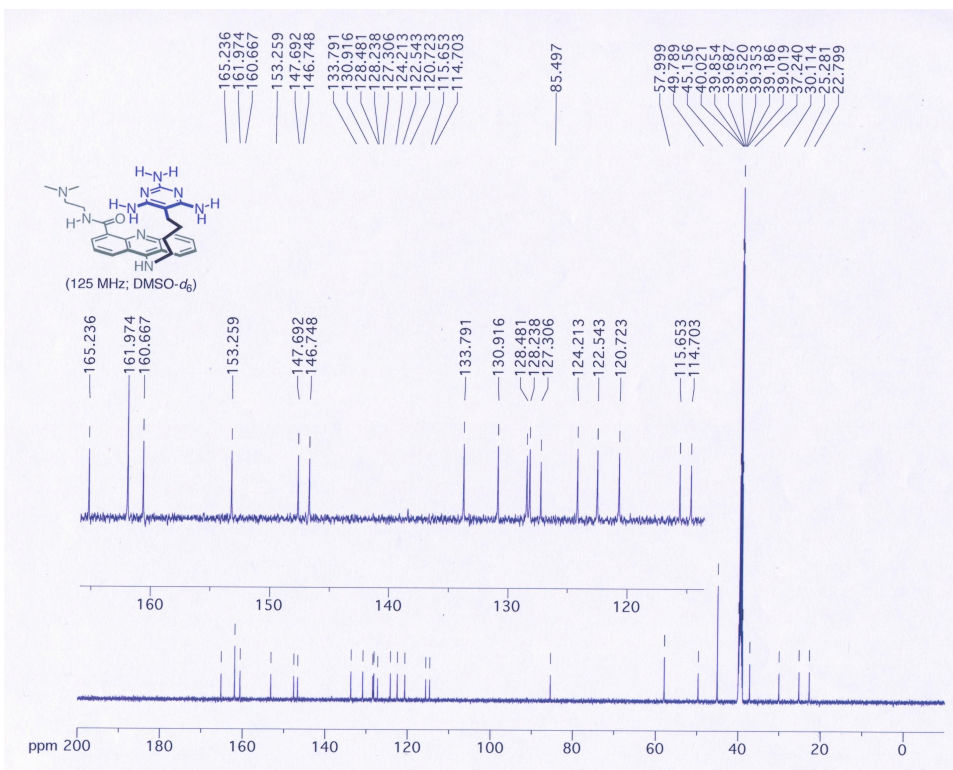

Supplement: supp_gkr415_Supp_Info.pdf [file supp_gkr415_Supp_Info.pdf]
